# Supplementary material
Source: PubMed Central journal article supplement (PMC6624826)
Supplement: jamapsychiatry-76-1018-s003.pdf [file jamapsychiatry-76-1018-s003.pdf]

## **Data Sharing Statement**

**Data**

**Data available:** No
